# Supplementary material for: Graphene inclusion induced ultralow thermal conductivity and improved figure of merit in p-type SnSe
Source: Royal Society of Chemistry journal article supplement (doi:10.1039/d0nr01949f), 2020-01-01
Supplement: d0nr01949f1.pdf [file d0nr01949f1.pdf]

## Supporting Information

### **Graphene Inclusion Induced Ultralow Thermal Conductivity and Improved Figure of Merit in *p*-type SnSe**

Lei Chen<sup>a</sup>, Weiyao Zhao<sup>a</sup>, Meng Li<sup>a</sup>, Guangsai Yang<sup>a</sup>, Sheik Md Kazi Nazrul Islam<sup>a</sup>, David R.G. Mitchell<sup>b</sup>, Zhenxiang Cheng<sup>a</sup>, Xiaolin Wang<sup>a1</sup>

- a Institute for Superconducting and Electronic Materials, Australian Institute for Innovative Materials, University of Wollongong, North Wollongong, 2500, Australia
- b Electron Microscopy Centre, Australian Institute for Innovative Materials, University of Wollongong, North Wollongong, NSW 2500, Australia

---

<sup>1</sup> xiaolin@uow.edu.au

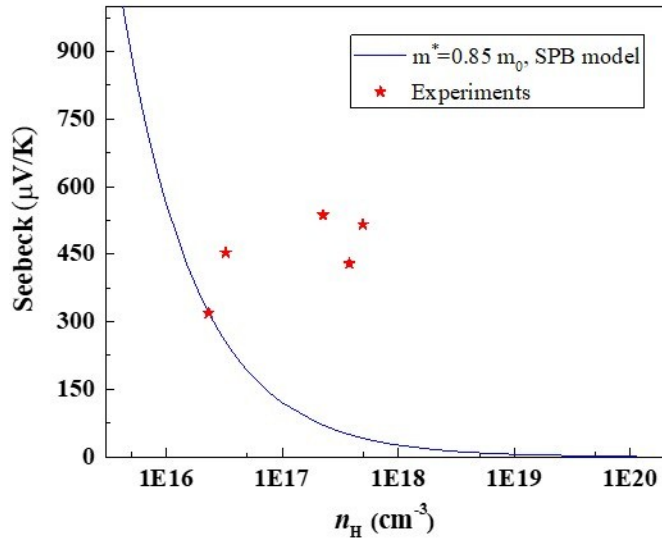

Fig. SI 1. The Pisarenko line calculated by the single parabolic band (SPB) model with the

equation 
$$S = \frac{8\pi^2 k_B^2}{3eh^2} m^* T \left( \frac{\pi}{3n} \right)^{\frac{2}{3}}, \text{ where } m^* = 0.85 m_0.$$
